# Supplementary material
Source: publisher figshare collection journal article supplement (https://acs.figshare.com/ndownloader/files/9465805)
Supplement: Supplementary file 1 [file 9465805]

## Supporting information

# *In situ* Studies of Solid Electrolyte Interphase (SEI) Formation on Crystalline Carbon Surfaces by Neutron Reflectometry and Atomic Force Microscopy

Miriam Steinhauer<sup>1,§</sup>, Michael Stich<sup>2,§,\*</sup>, Mario Kurniawan<sup>2</sup>, Beatrix-Kamelia Seidlhofer<sup>3</sup>, Marcus  
Trapp<sup>3</sup>, Andreas Bund<sup>2</sup>, Norbert Wagner<sup>1,\*</sup>, K. Andreas Friedrich<sup>1,4</sup>

<sup>1</sup>German Aerospace Center (DLR), Institute of Engineering Thermodynamics,  
Pfaffenwaldring 38-40, D-70569 Stuttgart, Germany

<sup>2</sup>Technische Universität Ilmenau, Electrochemistry and Electroplating Group,  
Gustav-Kirchhoff-Straße 6, D-98693 Ilmenau, Germany

<sup>3</sup>Helmholtz-Zentrum Berlin für Materialien und Energie, Institute for Soft Matter and Functional  
Materials, Hahn-Meitner-Platz 1, D-14109 Berlin, Germany

<sup>4</sup>University of Stuttgart, Institute for Energy Storage,  
Pfaffenwaldring 31, D-70569 Stuttgart, Germany

<sup>§</sup>M. Steinhauer and M. Stich contributed equally to this work.

\* Corresponding authors' email addresses: michael.stich@tu-ilmenau.de, norbert.wagner@dlr.de

Table S1: Fitting results for the X-Ray Reflectometry Measurement (#1, before cycling) in Figure 2 (a).

| Component        | Thickness / Å | Electron Density / $10^{-6} \text{ Å}^{-2}$ | Roughness / Å | $\chi^2$ |
|------------------|---------------|---------------------------------------------|---------------|----------|
| Carbon 1         | 119 ± 14      | 12.99 ± 0.70                                | 59.4 ± 5.7    | 0.0083   |
| Carbon 2         | 513 ± 4       | 14.36 ± 0.19                                | 22.9 ± 5.0    |          |
| SiO <sub>2</sub> | 30 ± 1        | 18.9 (fixed)                                | 12.3 ± 0.3    |          |
| Silicon          | INF           | 20.10 (fixed)                               | 11.1 ± 0.5    |          |

Table S2: Fitting results for the X-Ray Reflectometry Measurement (#2, before cycling) in Figure 2 (b).

| Component        | Thickness / Å | Electron Density / $10^{-6} \text{ Å}^{-2}$ | Roughness / Å | $\chi^2$ |
|------------------|---------------|---------------------------------------------|---------------|----------|
| Carbon 1         | 122 ± 16      | 11.28 ± 2.98                                | 54.8 ± 10.7   | 0.0106   |
| Carbon 2         | 422 ± 10      | 15.80 ± 0.13                                | 47.5 ± 11.4   |          |
| SiO <sub>2</sub> | 26 ± 1        | 18.9 (fixed)                                | 9.7 ± 0.3     |          |
| Silicon          | INF           | 20.10 (fixed)                               | 9.8 ± 0.4     |          |

Table S3: Fitting results for the X-Ray Reflectometry Measurement (#1, after cycling) in Figure 2 (c).

| Component        | Thickness / Å | Electron Density / $10^{-6} \text{ Å}^{-2}$ | Roughness / Å | $\chi^2$ |
|------------------|---------------|---------------------------------------------|---------------|----------|
| SEI 1            | 74 ± 19       | 8.30 ± 6.40                                 | 57.0 ± 26.8   | 0.0060   |
| SEI 2            | 200 ± 48      | 13.82 ± 2.06                                | 57.7 ± 8.8    |          |
| Carbon 1         | 103 ± 14      | 10.76 ± 1.32                                | 51.1 ± 14.3   |          |
| Carbon 2         | 451 ± 16      | 10.20 ± 0.08                                | 46.0 ± 33.5   |          |
| SiO <sub>2</sub> | 32 ± 8        | 16.81 ± 0.94                                | 12.3 ± 0.7    |          |
| Silicon          | INF           | 20.10 (fixed)                               | 25.3 ± 6.4    |          |

Table S4: Fitting results for the X-Ray Reflectometry Measurement (#2, after cycling) in Figure 2 (d).

| Component        | Thickness / Å | Electron Density / $10^{-6} \text{ Å}^{-2}$ | Roughness / Å | $\chi^2$ |
|------------------|---------------|---------------------------------------------|---------------|----------|
| SEI 1            | 80 ± 19       | 7.92 ± 2.04                                 | 49.2 ± 10.4   | 0.0145   |
| SEI 2            | 205 ± 48      | 13.01 ± 1.03                                | 58.0 ± 15.0   |          |
| Carbon 1 + 2     | 545 ± 26      | 11.37 ± 0.38                                | 48.8 ± 15.3   |          |
| SiO <sub>2</sub> | 22 ± 1        | 15.04 ± 0.40                                | 10.5 ± 0.2    |          |
| Silicon          | INF           | 20.10 (fixed)                               | 24.7 ± 1.1    |          |

Table S5: Fitting results for the Neutron Reflectometry Measurements obtained during discharging in Figure 3 (a) including thickness (t), scattering length density (SLD) and roughness (R) of the layers.

| U      | Carbon   |                                |         | SEI      |                                |        | $\chi^2$ |
|--------|----------|--------------------------------|---------|----------|--------------------------------|--------|----------|
|        | t / Å    | SLD / $10^{-6} \text{ Å}^{-6}$ | R / Å   | t / Å    | SLD / $10^{-6} \text{ Å}^{-6}$ | R / Å  |          |
| OCV    | 344 ± 1  | 3.56 ± 0.02                    | 29 ± 1  | 73 ± 3   | 0.42 ± 0.03                    | 13 ± 0 | 0.0036   |
| 1,50 V | 346 ± 5  | 3.53 ± 0.06                    | 34 ± 6  | 48 ± 3   | -0.08 ± 0.12                   | 22 ± 1 | 0.0450   |
| 1,25 V | 345 ± 4  | 3.46 ± 0.05                    | 34 ± 5  | 51 ± 3   | -0.10 ± 0.10                   | 34 ± 1 | 0.0368   |
| 1,00 V | 345 ± 4  | 3.45 ± 0.06                    | 31 ± 5  | 55 ± 3   | -0.03 ± 1.10                   | 32 ± 1 | 0.0448   |
| 0,80 V | 351 ± 6  | 3.35 ± 0.07                    | 39 ± 7  | 55 ± 4   | 0.01 ± 0.14                    | 27 ± 1 | 0.0638   |
| 0,60 V | 350 ± 7  | 3.12 ± 0.06                    | 35 ± 7  | 56 ± 5   | 0.19 ± 0.12                    | 27 ± 1 | 0.0594   |
| 0,50 V | 353 ± 11 | 2.95 ± 0.06                    | 39 ± 8  | 66 ± 7   | 0.70 ± 0.08                    | 17 ± 2 | 0.0353   |
| 0,40 V | 359 ± 16 | 2.76 ± 0.06                    | 48 ± 12 | 81 ± 9   | 0.54 ± 0.10                    | 28 ± 2 | 0.0757   |
| 0,30 V | 371 ± 22 | 2.69 ± 0.05                    | 74 ± 15 | 91 ± 13  | 0.83 ± 0.07                    | 21 ± 2 | 0.0601   |
| 0,20 V | 360 ± 32 | 2.52 ± 0.08                    | 78 ± 22 | 180 ± 14 | 0.84 ± 0.10                    | 24 ± 1 | 0.0572   |
| 0,10 V | 363 ± 72 | 2.53 ± 0.24                    | 80 ± 21 | 184 ± 43 | 0.80 ± 0.24                    | 15 ± 2 | 0.0618   |
| 0,02 V | 375 ± 81 | 2.53 ± 0.12                    | 96 ± 31 | 192 ± 28 | 0.80 ± 0.16                    | 15 ± 2 | 0.0959   |

Table S6: Fitting results for the Neutron Reflectometry Measurements obtained during charging in Figure 3 (b) including thickness (t), scattering length density (SLD) and roughness (R) of the different layers.

| U      | Carbon   |                                |         | SEI      |                                |        | $\chi^2$ |
|--------|----------|--------------------------------|---------|----------|--------------------------------|--------|----------|
|        | t / Å    | SLD / $10^{-6}\text{\AA}^{-2}$ | R / Å   | t / Å    | SLD / $10^{-6}\text{\AA}^{-2}$ | R / Å  |          |
| OCV    | 341 ± 19 | 2.64 ± 0.03                    | 55 ± 7  | 124 ± 19 | 1.15 ± 0.04                    | 11 ± 1 | 0.0365   |
| 1,50 V | 349 ± 40 | 2.63 ± 0.05                    | 60 ± 13 | 123 ± 13 | 1.01 ± 0.06                    | 19 ± 2 | 0.0491   |
| 1,00 V | 347 ± 58 | 2.70 ± 0.08                    | 98 ± 21 | 140 ± 54 | 0.94 ± 0.10                    | 15 ± 2 | 0.0711   |

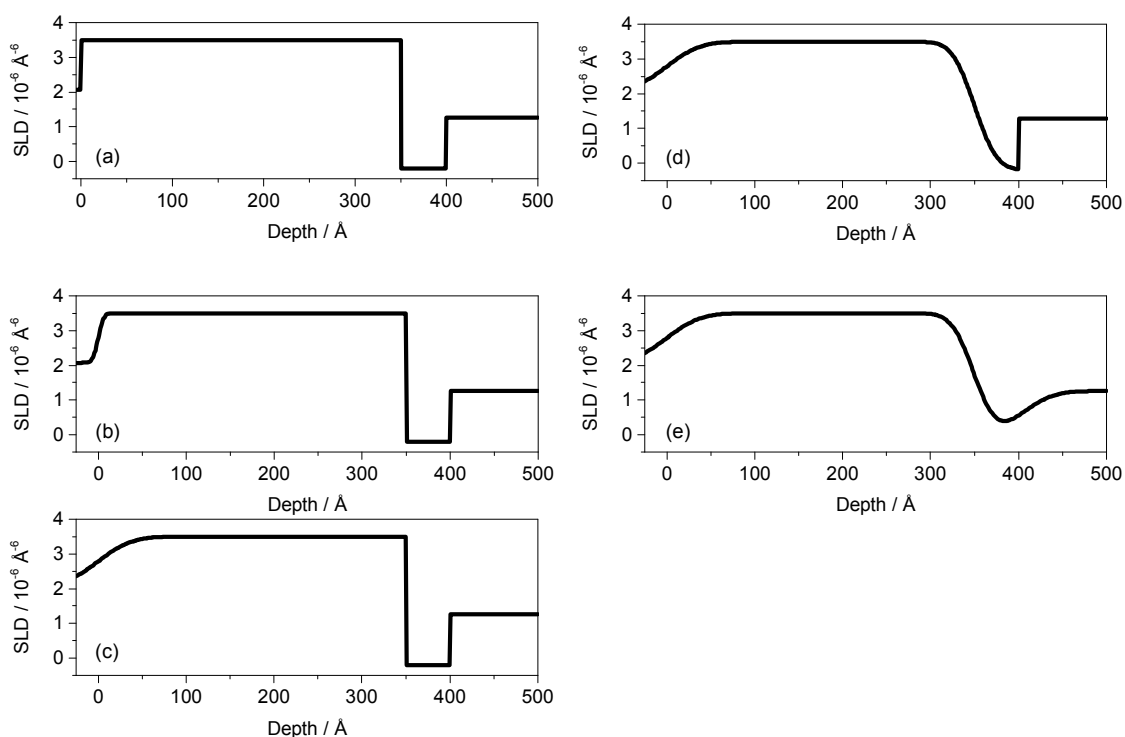

Figure S1. (a) Simulated SLD behavior for three layers (350 Å graphite, 50 Å SEI, electrolyte as fronting) on a silicon backing. The silicon's SLD is  $2.07 \cdot 10^{-6} \text{\AA}^{-2}$ , the graphite's SLD is  $3.5 \cdot 10^{-6} \text{\AA}^{-2}$ , the SEI's SLD is  $-0.2 \cdot 10^{-6} \text{\AA}^{-2}$  and the SLD of the electrolyte is  $1.263 \cdot 10^{-6} \text{\AA}^{-2}$ . The different layers are ideally smooth. (b) Simulated SLD behavior with a roughness of 5 Å at the silicon surface. (c) Simulated SLD behavior with a roughness of 30 Å at the silicon surface. (d) Simulated SLD behavior with a roughness of 30 Å at the silicon surface and a roughness of 20 Å at the carbon surface. (e) Simulated SLD behavior with a roughness of 30 Å at the silicon surface, 20 Å at the carbon surface and 30 Å at the SEI surface. Even though the SEI roughness remains unchanged, the overlapping SLDs of the electrolyte and the SEI lead to an averaged SLD in the diagram.

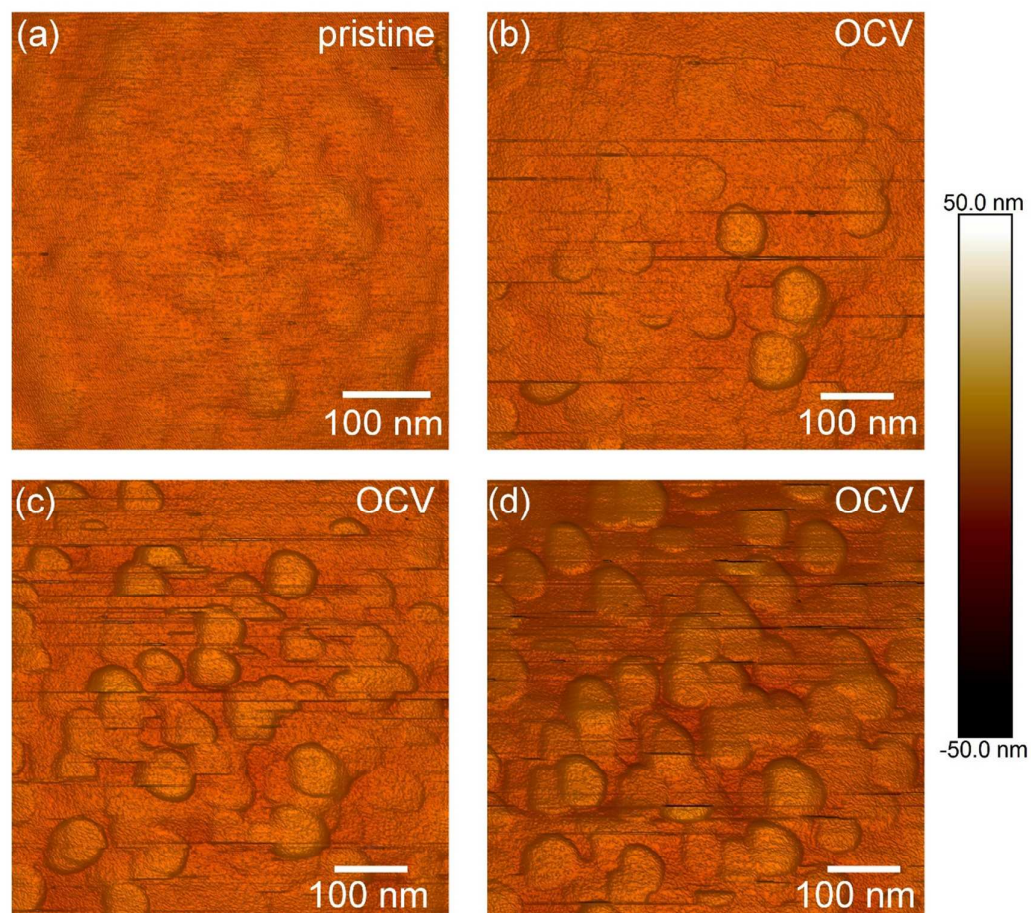

Figure S2. AFM images of (a) the pristine model electrode surface, (b) the model electrode at OCV after 24 min in contact with the electrolyte, (c) the model electrode at OCV after 28 min in contact with the electrolyte, (d) the model electrode at OCV after 33 min in contact with the electrolyte. Images (b)-(d) were taken at the same surface spot of the model electrode, while (a) was taken at a different surface spot.
